# Supplementary material
Source: MDPI journal article supplement (https://www.mdpi.com/2297-8739/10/7/405)
Supplement: s1 [file s1]

## Supplementary Materials

# Fluorinated Poly(ionic liquid)s Coated Superhydrophobic Functional Materials with Efficient Oil/Water Separation Performance

Fumin Shen <sup>1,†</sup>, Xuna Cheng <sup>2,†</sup>, Shunyang Yao <sup>2,\*</sup> and Yuanchao Pei <sup>3,\*</sup>

<sup>1</sup> School of Pharmacy, Xinxiang University, Xinxiang 453003, China; ayssfm@163.com

<sup>2</sup> College of Forestry, Henan Agricultural University, Zhengzhou 450002, China; bfchengxuna@163.com

<sup>3</sup> School of Chemistry and Chemical Engineering, Henan Normal University, Xinxiang 453007, China

\* Correspondence: yaosy0209@163.com (S.Y.); ycpei@htu.edu.cn (Y.P.)

† These authors contributed equally to this work.

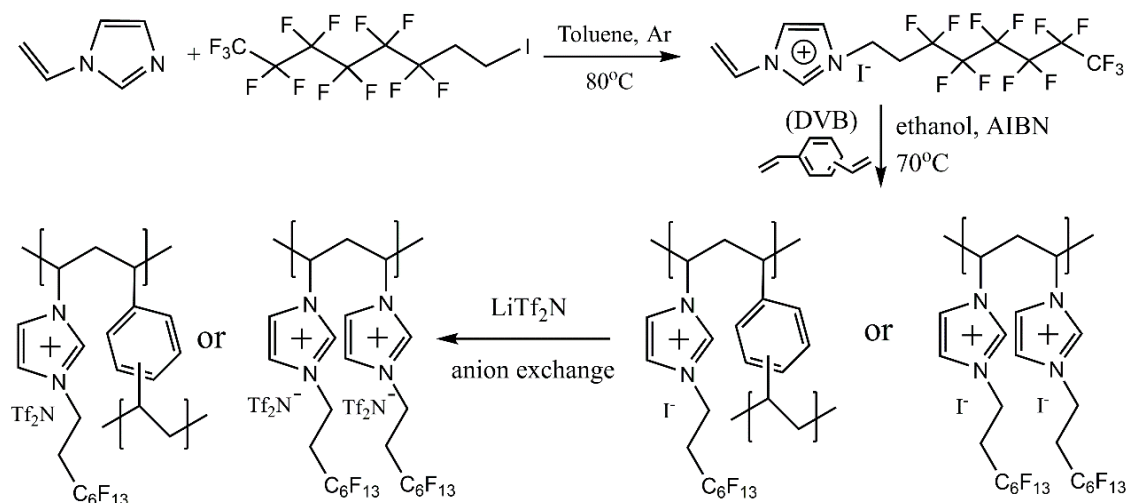

Scheme S1. The schematic of the reaction of PIL-1 with and without DVB.

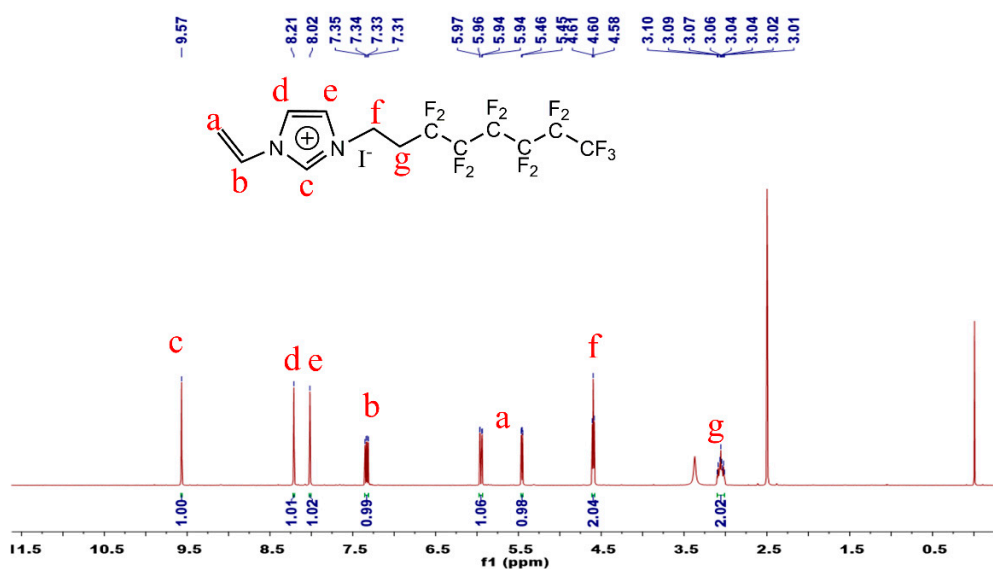



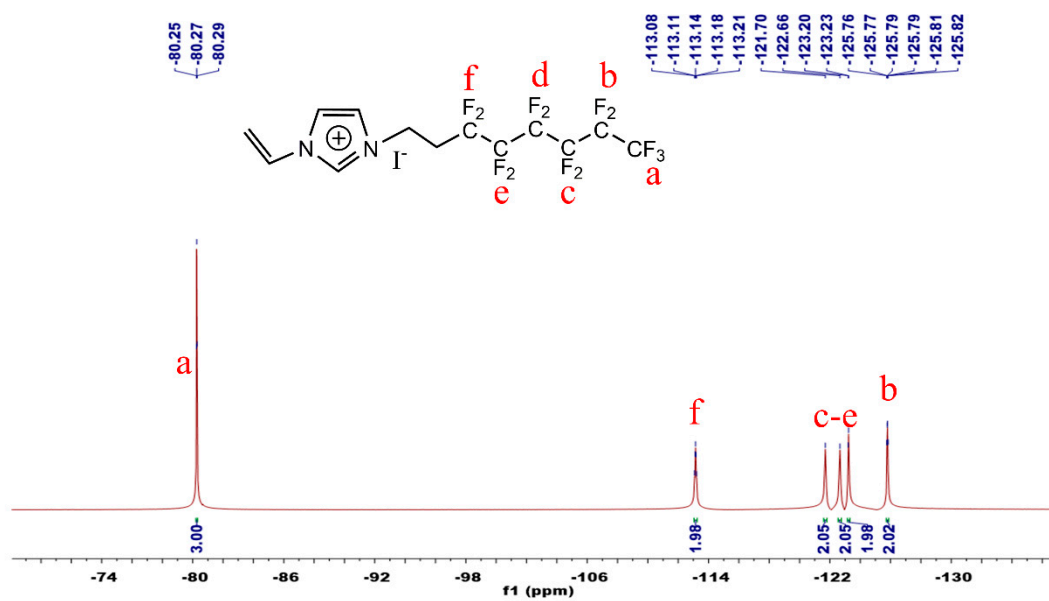

Figure S1. <sup>1</sup>H NMR and <sup>19</sup>F NMR spectra of [C<sub>8</sub>H<sub>4</sub>F<sub>13</sub>vim]<sup>+</sup>I<sup>-</sup>

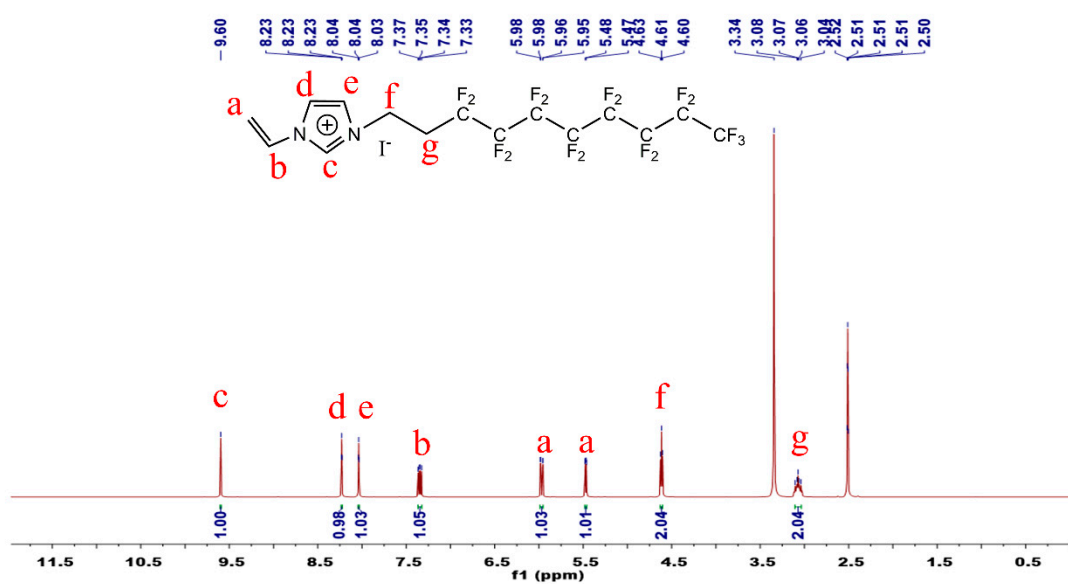



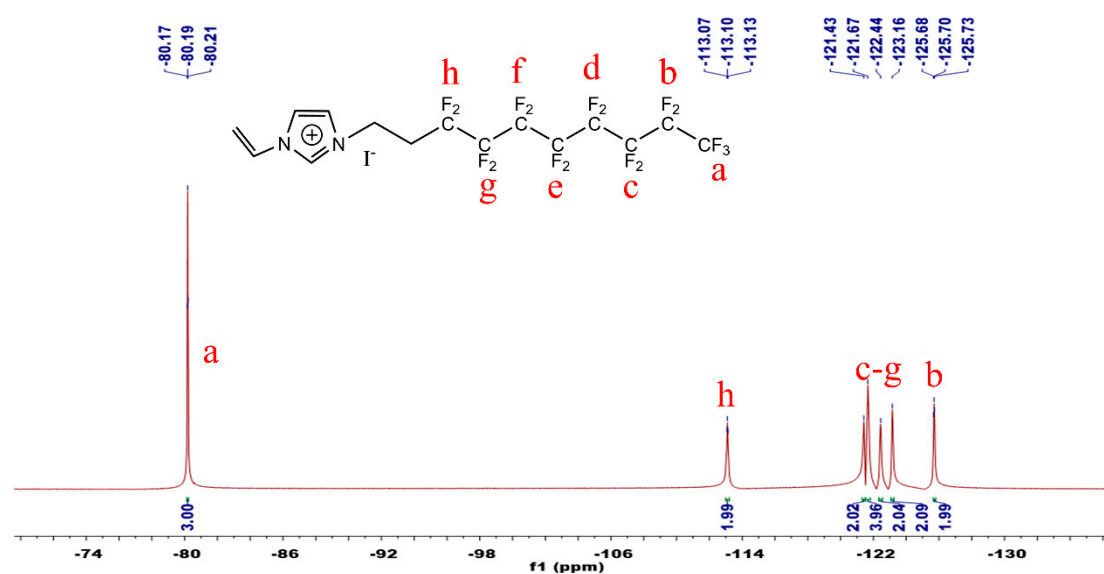

Figure S2. <sup>1</sup>H NMR and <sup>19</sup>F NMR spectra of  $[C_{10}H_4F_{17}vim]I$

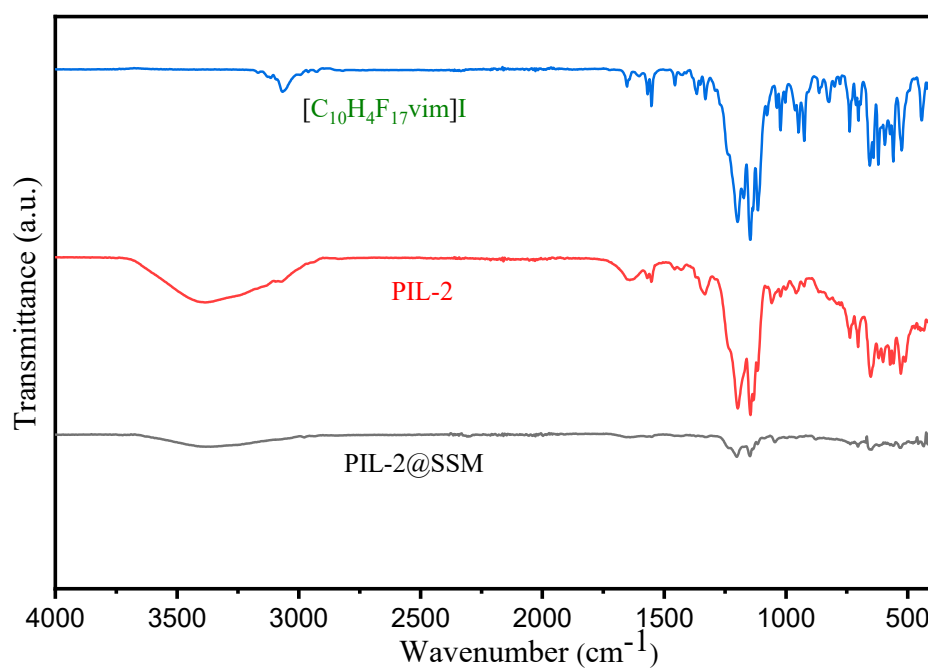

Figure S3. FTIR spectra of  $[C_{10}H_4F_{17}vim]I$



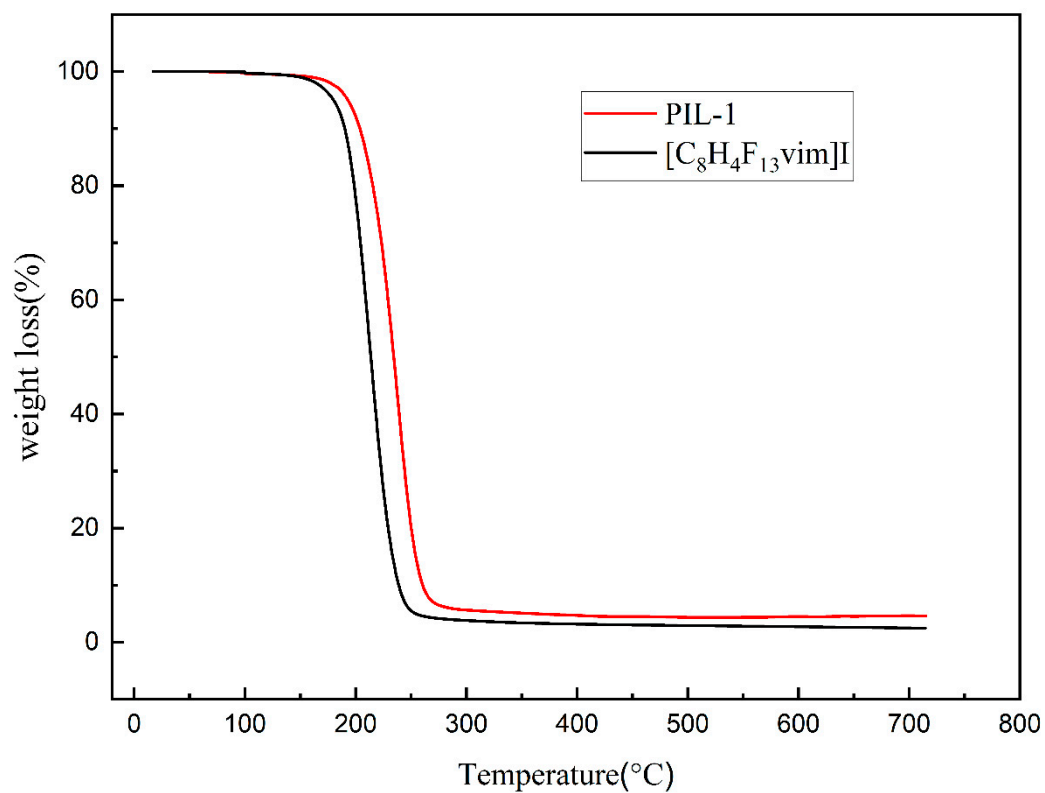

Figure S4. TGA curves of [C<sub>8</sub>H<sub>4</sub>F<sub>13</sub>vim]I and PIL-1

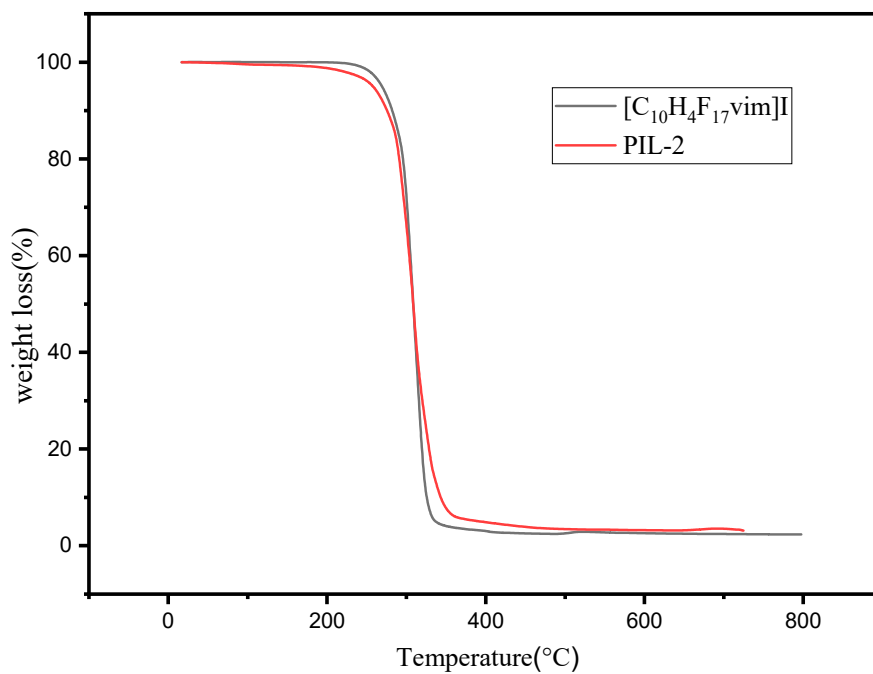

Figure S5. TGA curves of [C<sub>10</sub>H<sub>4</sub>F<sub>17</sub>vim]I and PIL-1



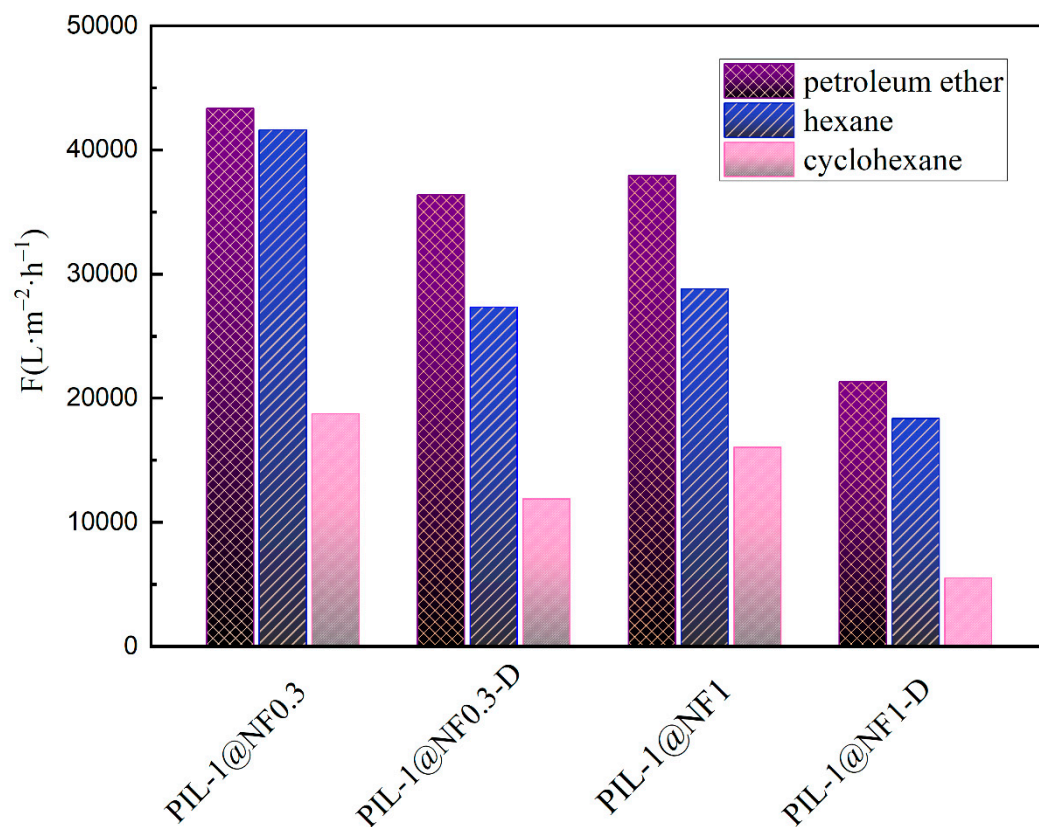

Figure S6. The permeate flux of oil phase for different materials

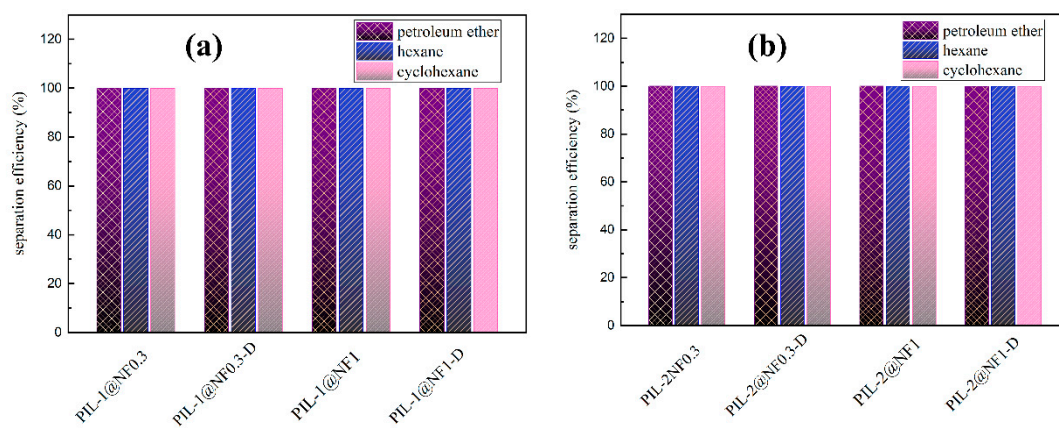

Figure S7. Separation efficiency of oil phase for different materials



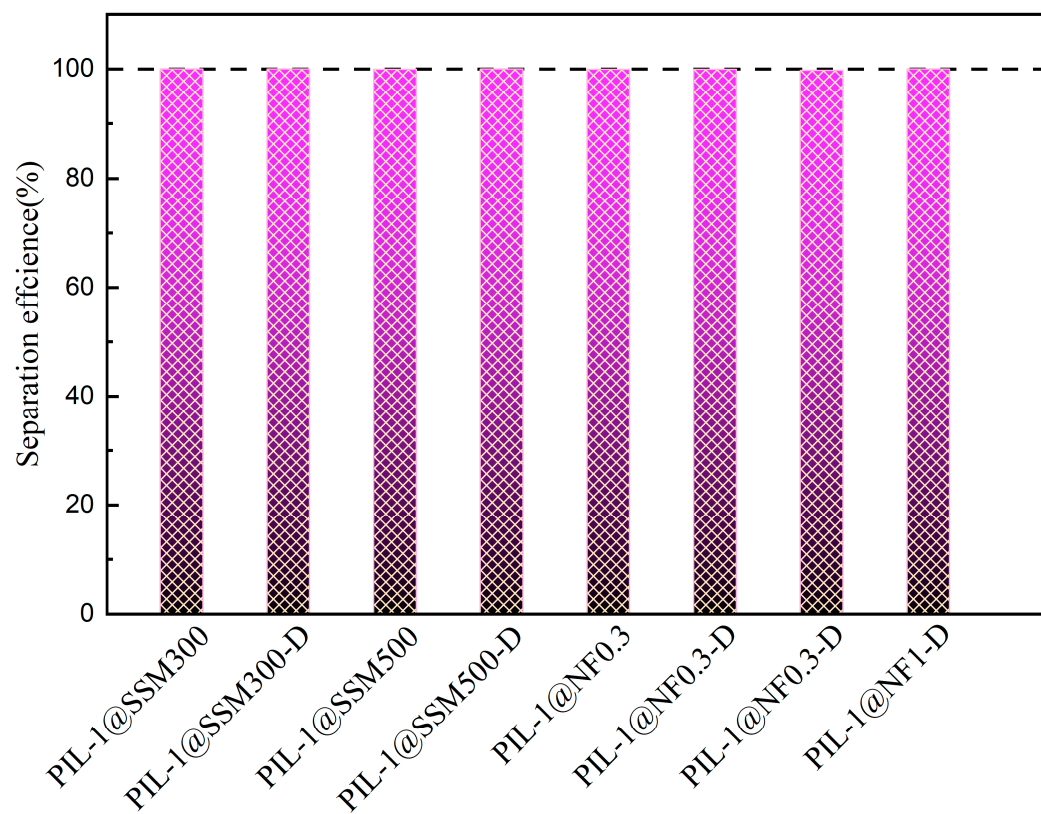

Figure S8. Separation efficiency of oil phase for different materials at least 20 times recycle
